# Supplementary material for: Prediction of HLA genotypes from single-cell transcriptome data
Source: PubMed Central journal article supplement (PMC10167300; doi:10.3389/fimmu.2023.1146826), 2023-04-25
Supplement: DataSheet_2.pdf [file DataSheet_2.pdf]

|      | Field 1     |             |             |             |             | Field 2     |             |             |             |             | Field 3     |             |             |
|------|-------------|-------------|-------------|-------------|-------------|-------------|-------------|-------------|-------------|-------------|-------------|-------------|-------------|
|      | scHLAccount | arcasHLA    | HLAminer    | PHLAT       | OptiType    | scHLAccount | arcasHLA    | HLAminer    | PHLAT       | OptiType    | scHLAccount | arcasHLA    | PHLAT       |
| A    | 0.68 ± 0.04 | 0.86 ± 0.03 | 0.71 ± 0.03 | 0.89 ± 0.03 | 0.92 ± 0.02 | 0.44 ± 0.04 | 0.64 ± 0.03 | 0.41 ± 0.03 | 0.81 ± 0.03 | 0.87 ± 0.03 | 0.06 ± 0.02 | 0.79 ± 0.03 | 0.8 ± 0.03  |
| B    | 0.44 ± 0.04 | 0.82 ± 0.02 | 0.56 ± 0.03 | 0.88 ± 0.02 | 0.92 ± 0.02 | 0.21 ± 0.03 | 0.63 ± 0.03 | 0.2 ± 0.03  | 0.81 ± 0.03 | 0.9 ± 0.02  | 0.2 ± 0.03  | 0.8 ± 0.03  | 0.83 ± 0.03 |
| C    | 0.82 ± 0.03 | 0.82 ± 0.02 | 0.66 ± 0.02 | 0.91 ± 0.02 | 0.94 ± 0.01 | 0.16 ± 0.03 | 0.55 ± 0.03 | 0.35 ± 0.03 | 0.81 ± 0.03 | 0.9 ± 0.02  | 0.02 ± 0.01 | 0.64 ± 0.03 | 0.82 ± 0.03 |
| DPA1 | 0.71 ± 0.02 | 0.95 ± 0.02 | 0.66 ± 0.02 | —           | —           | 0.69 ± 0.02 | 0.94 ± 0.02 | 0.54 ± 0.03 | —           | —           | 0.65 ± 0.03 | 0.94 ± 0.02 | —           |
| DPB1 | 0.25 ± 0.03 | 0.85 ± 0.03 | 0.43 ± 0.02 | —           | —           | 0.25 ± 0.03 | 0.84 ± 0.03 | 0.42 ± 0.02 | —           | —           | 0.34 ± 0.04 | 0.84 ± 0.03 | —           |
| DQA1 | 0.81 ± 0.03 | 0.92 ± 0.02 | 0.85 ± 0.02 | 0.94 ± 0.01 | —           | 0.55 ± 0.03 | 0.88 ± 0.02 | 0.55 ± 0.03 | 0.86 ± 0.03 | —           | 0.71 ± 0.04 | 0.88 ± 0.02 | 0.86 ± 0.03 |
| DQB1 | 0.83 ± 0.03 | 0.91 ± 0.02 | 0.88 ± 0.02 | 0.91 ± 0.02 | —           | 0.54 ± 0.04 | 0.76 ± 0.03 | 0.67 ± 0.03 | 0.89 ± 0.02 | —           | 0.59 ± 0.04 | 0.78 ± 0.03 | 0.87 ± 0.02 |
| DRB1 | 0.7 ± 0.04  | 0.9 ± 0.02  | 0.73 ± 0.03 | 0.89 ± 0.03 | —           | 0.48 ± 0.04 | 0.88 ± 0.03 | 0.34 ± 0.03 | 0.85 ± 0.03 | —           | 0.49 ± 0.04 | 0.88 ± 0.03 | 0.78 ± 0.03 |

**Supplemental Table 1 - 5'-based scRNA-seq success**

Success of predicted genotypes from 5'-based scRNA-seq sequences. Values represent mean success +/- SEM

|      | Field 1     |             |             |             |             | Field 2     |             |             |             |             | Field 3     |             |             |
|------|-------------|-------------|-------------|-------------|-------------|-------------|-------------|-------------|-------------|-------------|-------------|-------------|-------------|
|      | scHLAccount | arcasHLA    | HLAminer    | PHL/AT      | OptiType    | scHLAccount | arcasHLA    | HLAminer    | PHL/AT      | OptiType    | scHLAccount | arcasHLA    | PHL/AT      |
| A    | 0.41 ± 0.03 | 0.86 ± 0.03 | 0.7 ± 0.03  | 0.88 ± 0.03 | 0.81 ± 0.03 | 0.24 ± 0.02 | 0.63 ± 0.03 | 0.4 ± 0.03  | 0.8 ± 0.03  | 0.76 ± 0.04 | 0.02 ± 0.01 | 0.59 ± 0.03 | 0.44 ± 0.04 |
| B    | 0.26 ± 0.02 | 0.82 ± 0.03 | 0.56 ± 0.03 | 0.88 ± 0.02 | 0.81 ± 0.03 | 0.13 ± 0.02 | 0.62 ± 0.03 | 0.2 ± 0.03  | 0.81 ± 0.03 | 0.78 ± 0.03 | 0.07 ± 0.02 | 0.6 ± 0.03  | 0.58 ± 0.04 |
| C    | 0.48 ± 0.02 | 0.81 ± 0.02 | 0.66 ± 0.02 | 0.9 ± 0.02  | 0.82 ± 0.03 | 0.1 ± 0.02  | 0.55 ± 0.03 | 0.34 ± 0.03 | 0.81 ± 0.03 | 0.78 ± 0.03 | 0.01 ± 0.01 | 0.47 ± 0.03 | 0.44 ± 0.04 |
| DPA1 | 0.62 ± 0.02 | 0.94 ± 0.02 | 0.66 ± 0.02 | —           | —           | 0.6 ± 0.02  | 0.93 ± 0.02 | 0.53 ± 0.03 | —           | —           | 0.56 ± 0.03 | 0.92 ± 0.02 | —           |
| DPB1 | 0.21 ± 0.03 | 0.84 ± 0.03 | 0.42 ± 0.02 | —           | —           | 0.21 ± 0.03 | 0.83 ± 0.03 | 0.41 ± 0.02 | —           | —           | 0.21 ± 0.03 | 0.83 ± 0.03 | —           |
| DQA1 | 0.72 ± 0.03 | 0.91 ± 0.02 | 0.74 ± 0.03 | 0.93 ± 0.02 | —           | 0.48 ± 0.03 | 0.87 ± 0.02 | 0.47 ± 0.03 | 0.85 ± 0.03 | —           | 0.45 ± 0.03 | 0.87 ± 0.02 | 0.72 ± 0.03 |
| DQB1 | 0.53 ± 0.02 | 0.9 ± 0.02  | 0.75 ± 0.03 | 0.9 ± 0.02  | —           | 0.35 ± 0.03 | 0.75 ± 0.03 | 0.56 ± 0.03 | 0.88 ± 0.02 | —           | 0.3 ± 0.03  | 0.66 ± 0.03 | 0.7 ± 0.03  |
| DRB1 | 0.4 ± 0.02  | 0.9 ± 0.03  | 0.72 ± 0.03 | 0.88 ± 0.03 | —           | 0.28 ± 0.02 | 0.87 ± 0.03 | 0.33 ± 0.03 | 0.84 ± 0.03 | —           | 0.29 ± 0.03 | 0.88 ± 0.03 | 0.67 ± 0.04 |

**Supplemental Table 2 - 5'-based scRNA-seq accuracy**

Accuracy of predicted genotypes from 5'-based scRNA-seq sequences. Values represent mean accuracy +/- SEM

|      | Field 1     |             |             |          | Field 2     |             |             |             | Field 3     |             |
|------|-------------|-------------|-------------|----------|-------------|-------------|-------------|-------------|-------------|-------------|
|      | arcasHLA    | HLAminer    | PHLAT       | OptiType | arcasHLA    | HLAminer    | PHLAT       | OptiType    | arcasHLA    | PHLAT       |
| A    | 0.95 ± 0.03 | 0.5 ± 0.06  | 1 ± 0       | 1 ± 0    | 0.58 ± 0.07 | 0.35 ± 0.07 | 0.95 ± 0.03 | 0.95 ± 0.03 | 0.38 ± 0.06 | 0.72 ± 0.08 |
| B    | 0.9 ± 0.04  | 0.4 ± 0.04  | 1 ± 0       | 1 ± 0    | 0.82 ± 0.05 | 0.2 ± 0.05  | 0.9 ± 0.05  | 1 ± 0       | 0.7 ± 0.06  | 0.55 ± 0.09 |
| C    | 0.98 ± 0.02 | 0.48 ± 0.08 | 0.98 ± 0.02 | 1 ± 0    | 0.85 ± 0.06 | 0.3 ± 0.06  | 0.82 ± 0.05 | 0.92 ± 0.04 | 0.62 ± 0.06 | 0.42 ± 0.07 |
| DPA1 | 0.95 ± 0.03 | 0.48 ± 0.02 | —           | —        | 0.95 ± 0.03 | 0.38 ± 0.04 | —           | —           | 0.92 ± 0.05 | —           |
| DPB1 | 0.75 ± 0.05 | 0.32 ± 0.06 | —           | —        | 0.75 ± 0.05 | 0.28 ± 0.05 | —           | —           | 0.75 ± 0.05 | —           |
| DQA1 | 0.78 ± 0.05 | 0.58 ± 0.04 | 0.82 ± 0.05 | —        | 0.72 ± 0.06 | 0.38 ± 0.06 | 0.82 ± 0.05 | —           | 0.72 ± 0.06 | 0.58 ± 0.09 |
| DQB1 | 1 ± 0       | 0.15 ± 0.06 | 1 ± 0       | —        | 0.4 ± 0.06  | 0.07 ± 0.04 | 0.92 ± 0.04 | —           | 0.05 ± 0.03 | 0.68 ± 0.07 |
| DRB1 | 0.9 ± 0.04  | 0.55 ± 0.06 | 1 ± 0       | —        | 0.9 ± 0.04  | 0.32 ± 0.07 | 0.98 ± 0.02 | —           | 0.9 ± 0.04  | 0.72 ± 0.08 |
| DRB3 | 0.32 ± 0.11 | 0.27 ± 0.11 | —           | —        | 0.32 ± 0.11 | 0.18 ± 0.09 | —           | —           | 0.32 ± 0.11 | —           |
| DRB4 | 0.3 ± 0.1   | 0.75 ± 0.1  | —           | —        | 0.25 ± 0.08 | 0.25 ± 0.1  | —           | —           | 0.25 ± 0.08 | —           |
| DRB5 | 0.57 ± 0.08 | 0.71 ± 0.09 | —           | —        | 0.5 ± 0.09  | 0.57 ± 0.1  | —           | —           | 0.5 ± 0.09  | —           |

**Supplemental Table 3 - 3'-based scRNA-seq accuracy**

Accuracy of predicted genotypes from 3'-based scRNA-seq sequences. Values represent mean accuracy +/- SEM

|      | Field 1     |             |       |          | Field 2     |             |             |             | Field 3     |             |
|------|-------------|-------------|-------|----------|-------------|-------------|-------------|-------------|-------------|-------------|
|      | arcasHLA    | HLAminer    | PHLAT | OptiType | arcasHLA    | HLAminer    | PHLAT       | OptiType    | arcasHLA    | PHLAT       |
| A    | 1 ± 0       | 0.56 ± 0.06 | 1 ± 0 | 1 ± 0    | 0.94 ± 0.06 | 0.25 ± 0.09 | 1 ± 0       | 0.94 ± 0.06 | 0.94 ± 0.06 | 0.81 ± 0.13 |
| B    | 1 ± 0       | 0.75 ± 0.09 | 1 ± 0 | 1 ± 0    | 1 ± 0       | 0.25 ± 0.13 | 1 ± 0       | 1 ± 0       | 1 ± 0       | 0.75 ± 0.16 |
| C    | 1 ± 0       | 1 ± 0       | 1 ± 0 | 1 ± 0    | 1 ± 0       | 0.44 ± 0.11 | 0.94 ± 0.06 | 0.94 ± 0.06 | 1 ± 0       | 0.31 ± 0.16 |
| DPA1 | 1 ± 0       | 0.69 ± 0.09 | —     | —        | 1 ± 0       | 0.69 ± 0.09 | —           | —           | 1 ± 0       | —           |
| DPB1 | 1 ± 0       | 0.75 ± 0.09 | —     | —        | 1 ± 0       | 0.75 ± 0.09 | —           | —           | 1 ± 0       | —           |
| DQA1 | 1 ± 0       | 0.81 ± 0.09 | 1 ± 0 | —        | 1 ± 0       | 0.44 ± 0.15 | 1 ± 0       | —           | 1 ± 0       | 0.88 ± 0.08 |
| DQB1 | 0.88 ± 0.08 | 0.88 ± 0.08 | 1 ± 0 | —        | 0.88 ± 0.08 | 0.56 ± 0.11 | 1 ± 0       | —           | 0.88 ± 0.08 | 0.88 ± 0.08 |
| DRB1 | 1 ± 0       | 1 ± 0       | 1 ± 0 | —        | 1 ± 0       | 0.69 ± 0.09 | 1 ± 0       | —           | 1 ± 0       | 0.62 ± 0.16 |
| DRB3 | 1 ± 0       | 1 ± 0       | —     | —        | 1 ± 0       | 1 ± 0       | —           | —           | 1 ± 0       | —           |
| DRB4 | 0.67 ± 0.1  | 1 ± 0       | —     | —        | 0.67 ± 0.1  | 0.33 ± 0.2  | —           | —           | 0.67 ± 0.1  | —           |
| DRB5 | 0.75 ± 0.18 | 0.75 ± 0.18 | —     | —        | 0.75 ± 0.18 | 0.5 ± 0.2   | —           | —           | 0.75 ± 0.18 | —           |

**Supplemental Table 4 - Paired-end bulkRNA-seq accuracy**

Accuracy of predicted genotypes from bulk RNA-seq sequences. Values represent mean accuracy +/- SEM

|      | Field 1        |                |                |                | Field 2        |                |                |                | Field 3        |                |            |          |
|------|----------------|----------------|----------------|----------------|----------------|----------------|----------------|----------------|----------------|----------------|------------|----------|
|      | arcasHLA       |                | HLAminer       |                | arcasHLA       |                | HLAminer       |                | arcasHLA       |                | HLAminer   |          |
|      | Unfiltered     | Filtered       | Unfiltered     | Filtered       | Unfiltered     | Filtered       | Unfiltered     | Filtered       | Unfiltered     | Filtered       | Unfiltered | Filtered |
| DRB3 | 0.46 ±<br>0.03 | 0.79 ±<br>0.04 | 0.44 ±<br>0.03 | 0.78 ±<br>0.03 | 0.46 ±<br>0.03 | 0.79 ±<br>0.04 | 0.35 ±<br>0.03 | 0.65 ±<br>0.04 | 0.46 ±<br>0.03 | 0.79 ±<br>0.04 | —          | —        |
| DRB4 | 0.44 ±<br>0.02 | 0.91 ±<br>0.02 | 0.77 ±<br>0.04 | 0.88 ±<br>0.03 | 0.4 ±<br>0.02  | 0.69 ±<br>0.04 | 0.14 ±<br>0.03 | 0.17 ±<br>0.03 | 0.39 ±<br>0.03 | 0.66 ±<br>0.04 | —          | —        |
| DRB5 | 0.35 ±<br>0.03 | 0.9 ±<br>0.03  | 0.33 ±<br>0.03 | 0.83 ±<br>0.03 | 0.35 ±<br>0.03 | 0.88 ±<br>0.03 | 0.15 ±<br>0.03 | 0.33 ±<br>0.04 | 0.33 ±<br>0.03 | 0.86 ±<br>0.03 | —          | —        |

**Supplemental Table 5 - *HLA-DRB345* accuracy**

Accuracy of *HLA-DRB345* genotypes filtered or unfiltered by KNN copy number classifier. Values represent mean accuracy +/- SEM

|      | Field 1     |             |             |             |             |             |             |             | Field 2     |             |             |             |             |             |             |             | Field 3     |             |             |             |
|------|-------------|-------------|-------------|-------------|-------------|-------------|-------------|-------------|-------------|-------------|-------------|-------------|-------------|-------------|-------------|-------------|-------------|-------------|-------------|-------------|
|      | arcasHLA    |             | HLAminer    |             | PHLAT       |             | OptiType    |             | arcasHLA    |             | HLAminer    |             | PHLAT       |             | OptiType    |             | arcasHLA    |             | PHLAT       |             |
|      | T1          | T2          | T1          | T2          | T1          | T2          | T1          | T2          | T1          | T2          | T1          | T2          | T1          | T2          | T1          | T2          | T1          | T2          | T1          | T2          |
| A    | 0.9 ± 0.02  | 0.86 ± 0.03 | 0.68 ± 0.03 | 0.7 ± 0.03  | 0.9 ± 0.02  | 0.89 ± 0.03 | 0.85 ± 0.03 | 0.86 ± 0.03 | 0.67 ± 0.03 | 0.64 ± 0.03 | 0.33 ± 0.03 | 0.41 ± 0.03 | 0.84 ± 0.03 | 0.81 ± 0.03 | 0.8 ± 0.03  | 0.81 ± 0.03 | 0.68 ± 0.04 | 0.64 ± 0.04 | 0.72 ± 0.04 | 0.66 ± 0.04 |
| B    | 0.86 ± 0.02 | 0.82 ± 0.02 | 0.52 ± 0.03 | 0.56 ± 0.03 | 0.9 ± 0.02  | 0.88 ± 0.02 | 0.86 ± 0.03 | 0.86 ± 0.03 | 0.65 ± 0.03 | 0.63 ± 0.03 | 0.22 ± 0.03 | 0.2 ± 0.03  | 0.8 ± 0.03  | 0.81 ± 0.03 | 0.83 ± 0.03 | 0.83 ± 0.03 | 0.72 ± 0.04 | 0.71 ± 0.04 | 0.75 ± 0.04 | 0.74 ± 0.04 |
| C    | 0.8 ± 0.03  | 0.82 ± 0.02 | 0.67 ± 0.03 | 0.66 ± 0.02 | 0.9 ± 0.02  | 0.91 ± 0.02 | 0.85 ± 0.03 | 0.88 ± 0.03 | 0.55 ± 0.03 | 0.55 ± 0.03 | 0.41 ± 0.03 | 0.35 ± 0.03 | 0.8 ± 0.03  | 0.81 ± 0.03 | 0.81 ± 0.03 | 0.83 ± 0.03 | 0.56 ± 0.04 | 0.54 ± 0.03 | 0.62 ± 0.04 | 0.62 ± 0.04 |
| DPA1 | 0.96 ± 0.01 | 0.95 ± 0.02 | 0.66 ± 0.02 | 0.66 ± 0.02 | —           | —           | —           | —           | 0.95 ± 0.01 | 0.94 ± 0.02 | 0.55 ± 0.03 | 0.54 ± 0.03 | —           | —           | —           | —           | 0.94 ± 0.01 | 0.93 ± 0.02 | —           | —           |
| DPB1 | 0.9 ± 0.02  | 0.85 ± 0.03 | 0.44 ± 0.03 | 0.43 ± 0.02 | —           | —           | —           | —           | 0.88 ± 0.02 | 0.84 ± 0.03 | 0.44 ± 0.03 | 0.41 ± 0.02 | —           | —           | —           | —           | 0.88 ± 0.02 | 0.83 ± 0.03 | —           | —           |
| DQA1 | 0.94 ± 0.02 | 0.92 ± 0.02 | 0.75 ± 0.02 | 0.74 ± 0.02 | 0.95 ± 0.02 | 0.94 ± 0.01 | —           | —           | 0.9 ± 0.02  | 0.88 ± 0.02 | 0.45 ± 0.03 | 0.47 ± 0.03 | 0.89 ± 0.02 | 0.86 ± 0.03 | —           | —           | 0.88 ± 0.03 | 0.88 ± 0.02 | 0.78 ± 0.03 | 0.74 ± 0.03 |
| DQB1 | 0.94 ± 0.02 | 0.91 ± 0.02 | 0.79 ± 0.02 | 0.75 ± 0.03 | 0.93 ± 0.02 | 0.91 ± 0.02 | —           | —           | 0.77 ± 0.03 | 0.76 ± 0.03 | 0.62 ± 0.03 | 0.56 ± 0.03 | 0.91 ± 0.02 | 0.89 ± 0.02 | —           | —           | 0.76 ± 0.03 | 0.72 ± 0.03 | 0.86 ± 0.03 | 0.83 ± 0.03 |
| DRB1 | 0.93 ± 0.02 | 0.9 ± 0.02  | 0.71 ± 0.03 | 0.73 ± 0.03 | 0.93 ± 0.02 | 0.89 ± 0.03 | —           | —           | 0.9 ± 0.02  | 0.88 ± 0.03 | 0.36 ± 0.03 | 0.34 ± 0.03 | 0.88 ± 0.03 | 0.85 ± 0.03 | —           | —           | 0.91 ± 0.02 | 0.89 ± 0.03 | 0.77 ± 0.03 | 0.75 ± 0.03 |
| DRB3 | 0.82 ± 0.04 | 0.82 ± 0.04 | 0.71 ± 0.05 | 0.79 ± 0.04 | —           | —           | —           | —           | 0.82 ± 0.04 | 0.82 ± 0.04 | 0.62 ± 0.05 | 0.66 ± 0.05 | —           | —           | —           | —           | 0.82 ± 0.04 | 0.82 ± 0.04 | —           | —           |
| DRB4 | 0.95 ± 0.03 | 0.92 ± 0.03 | 0.91 ± 0.03 | 0.89 ± 0.03 | —           | —           | —           | —           | 0.81 ± 0.05 | 0.69 ± 0.06 | 0.15 ± 0.05 | 0.17 ± 0.05 | —           | —           | —           | —           | 0.79 ± 0.05 | 0.66 ± 0.06 | —           | —           |
| DRB5 | 0.91 ± 0.04 | 0.91 ± 0.04 | 0.77 ± 0.06 | 0.84 ± 0.05 | —           | —           | —           | —           | 0.91 ± 0.04 | 0.91 ± 0.04 | 0.49 ± 0.07 | 0.33 ± 0.07 | —           | —           | —           | —           | 0.9 ± 0.05  | 0.9 ± 0.04  | —           | —           |

**Supplemental Table 6 - Reproducibility of genotype prediction accuracy**

Accuracy of predicted genotypes from repeated sampling of individuals at time point 1 (T1) and time point 2 (T2). Values represent mean accuracy +/- SEM

|         | Field 1       |              |             |             |             |             | Field 2       |              |             |             |             |             | Field 3       |              |             |             |
|---------|---------------|--------------|-------------|-------------|-------------|-------------|---------------|--------------|-------------|-------------|-------------|-------------|---------------|--------------|-------------|-------------|
|         | Composite AOP | Composite AO | arcasHLA    | HLAminer    | PHLAT       | OptiType    | Composite AOP | Composite AO | arcasHLA    | HLAminer    | PHLAT       | OptiType    | Composite AOP | Composite AO | arcasHLA    | PHLAT       |
| MHC All | 0.9 ± 0.02    | 0.89 ± 0.02  | 0.87 ± 0.02 | 0.67 ± 0.01 | 0.67 ± 0.01 | 0.3 ± 0.01  | 0.86 ± 0.02   | 0.84 ± 0.02  | 0.76 ± 0.02 | 0.41 ± 0.01 | 0.62 ± 0.02 | 0.29 ± 0.01 | 0.78 ± 0.02   | 0.74 ± 0.02  | 0.74 ± 0.02 | 0.45 ± 0.02 |
| MHC I   | 0.9 ± 0.02    | 0.89 ± 0.02  | 0.83 ± 0.02 | 0.63 ± 0.02 | 0.89 ± 0.02 | 0.81 ± 0.03 | 0.85 ± 0.02   | 0.84 ± 0.02  | 0.6 ± 0.02  | 0.31 ± 0.02 | 0.8 ± 0.02  | 0.78 ± 0.03 | 0.64 ± 0.02   | 0.56 ± 0.02  | 0.56 ± 0.02 | 0.49 ± 0.03 |
| MHC II  | 0.9 ± 0.02    | 0.9 ± 0.02   | 0.9 ± 0.02  | 0.68 ± 0.02 | 0.54 ± 0.01 | 0 ± 0       | 0.87 ± 0.02   | 0.84 ± 0.02  | 0.84 ± 0.02 | 0.46 ± 0.02 | 0.52 ± 0.01 | 0 ± 0       | 0.85 ± 0.02   | 0.83 ± 0.02  | 0.83 ± 0.02 | 0.42 ± 0.01 |
| A       | 0.89 ± 0.03   | 0.89 ± 0.03  | 0.86 ± 0.03 | 0.7 ± 0.03  | 0.88 ± 0.03 | 0.81 ± 0.03 | 0.84 ± 0.03   | 0.82 ± 0.03  | 0.63 ± 0.03 | 0.4 ± 0.03  | 0.8 ± 0.03  | 0.76 ± 0.04 | 0.64 ± 0.03   | 0.59 ± 0.03  | 0.59 ± 0.03 | 0.44 ± 0.04 |
| B       | 0.88 ± 0.02   | 0.88 ± 0.02  | 0.82 ± 0.03 | 0.56 ± 0.03 | 0.88 ± 0.02 | 0.81 ± 0.03 | 0.84 ± 0.03   | 0.85 ± 0.03  | 0.62 ± 0.03 | 0.2 ± 0.03  | 0.81 ± 0.03 | 0.78 ± 0.03 | 0.68 ± 0.03   | 0.6 ± 0.03   | 0.6 ± 0.03  | 0.58 ± 0.04 |
| C       | 0.92 ± 0.02   | 0.91 ± 0.02  | 0.81 ± 0.02 | 0.66 ± 0.02 | 0.9 ± 0.02  | 0.82 ± 0.03 | 0.86 ± 0.02   | 0.84 ± 0.02  | 0.55 ± 0.03 | 0.34 ± 0.03 | 0.81 ± 0.03 | 0.78 ± 0.03 | 0.59 ± 0.03   | 0.47 ± 0.03  | 0.47 ± 0.03 | 0.44 ± 0.04 |
| DPA1    | 0.94 ± 0.02   | 0.94 ± 0.02  | 0.94 ± 0.02 | 0.66 ± 0.02 | —           | —           | 0.93 ± 0.02   | 0.93 ± 0.02  | 0.93 ± 0.02 | 0.53 ± 0.03 | —           | —           | 0.92 ± 0.02   | 0.92 ± 0.02  | 0.92 ± 0.02 | —           |
| DPB1    | 0.84 ± 0.03   | 0.84 ± 0.03  | 0.84 ± 0.03 | 0.42 ± 0.02 | —           | —           | 0.83 ± 0.03   | 0.83 ± 0.03  | 0.83 ± 0.03 | 0.41 ± 0.02 | —           | —           | 0.83 ± 0.03   | 0.83 ± 0.03  | 0.83 ± 0.03 | —           |
| DQA1    | 0.91 ± 0.02   | 0.91 ± 0.02  | 0.91 ± 0.02 | 0.74 ± 0.03 | 0.93 ± 0.02 | —           | 0.87 ± 0.02   | 0.87 ± 0.02  | 0.87 ± 0.02 | 0.47 ± 0.03 | 0.85 ± 0.03 | —           | 0.87 ± 0.02   | 0.87 ± 0.02  | 0.87 ± 0.02 | 0.72 ± 0.03 |
| DQB1    | 0.9 ± 0.02    | 0.9 ± 0.02   | 0.9 ± 0.02  | 0.75 ± 0.03 | 0.9 ± 0.02  | —           | 0.88 ± 0.02   | 0.75 ± 0.03  | 0.75 ± 0.03 | 0.56 ± 0.03 | 0.88 ± 0.02 | —           | 0.79 ± 0.03   | 0.66 ± 0.03  | 0.66 ± 0.03 | 0.7 ± 0.03  |
| DRB1    | 0.9 ± 0.03    | 0.9 ± 0.03   | 0.9 ± 0.03  | 0.72 ± 0.03 | 0.88 ± 0.03 | —           | 0.87 ± 0.03   | 0.87 ± 0.03  | 0.87 ± 0.03 | 0.33 ± 0.03 | 0.84 ± 0.03 | —           | 0.88 ± 0.03   | 0.88 ± 0.03  | 0.88 ± 0.03 | 0.67 ± 0.04 |
| DRB3    | 0.8 ± 0.04    | 0.8 ± 0.04   | 0.8 ± 0.04  | 0.77 ± 0.03 | —           | —           | 0.8 ± 0.04    | 0.8 ± 0.04   | 0.8 ± 0.04  | 0.64 ± 0.04 | —           | —           | 0.8 ± 0.04    | 0.8 ± 0.04   | 0.8 ± 0.04  | —           |
| DRB4    | 0.92 ± 0.02   | 0.92 ± 0.02  | 0.92 ± 0.02 | 0.89 ± 0.02 | —           | —           | 0.69 ± 0.04   | 0.69 ± 0.04  | 0.69 ± 0.04 | 0.17 ± 0.03 | —           | —           | 0.66 ± 0.04   | 0.66 ± 0.04  | 0.66 ± 0.04 | —           |
| DRB5    | 0.88 ± 0.03   | 0.88 ± 0.03  | 0.88 ± 0.03 | 0.8 ± 0.03  | —           | —           | 0.88 ± 0.03   | 0.88 ± 0.03  | 0.88 ± 0.03 | 0.31 ± 0.04 | —           | —           | 0.86 ± 0.03   | 0.86 ± 0.03  | 0.86 ± 0.03 | —           |

**Supplemental Table 7 - Composite genotype accuracy**

Success of predicted genotypes from using decision tree-based composites. AOP = arcasHLA, OptiType, and PHLAT, AO = arcasHLA and OptiType. Values represent mean accuracy +/- SEM
